# Supplementary material for: Two-Step Targeted Drug Delivery via Proteinaceous Barnase-Barstar Interface and PLGA-Based Nano-Carrier
Source: Research Square preprint supplement (doi:10.21203/rs.3.rs-1029355/v2), 2022-02-18
Supplement: Supplementary file 1 [file fa57e365edaee9f26d427d91.docx]

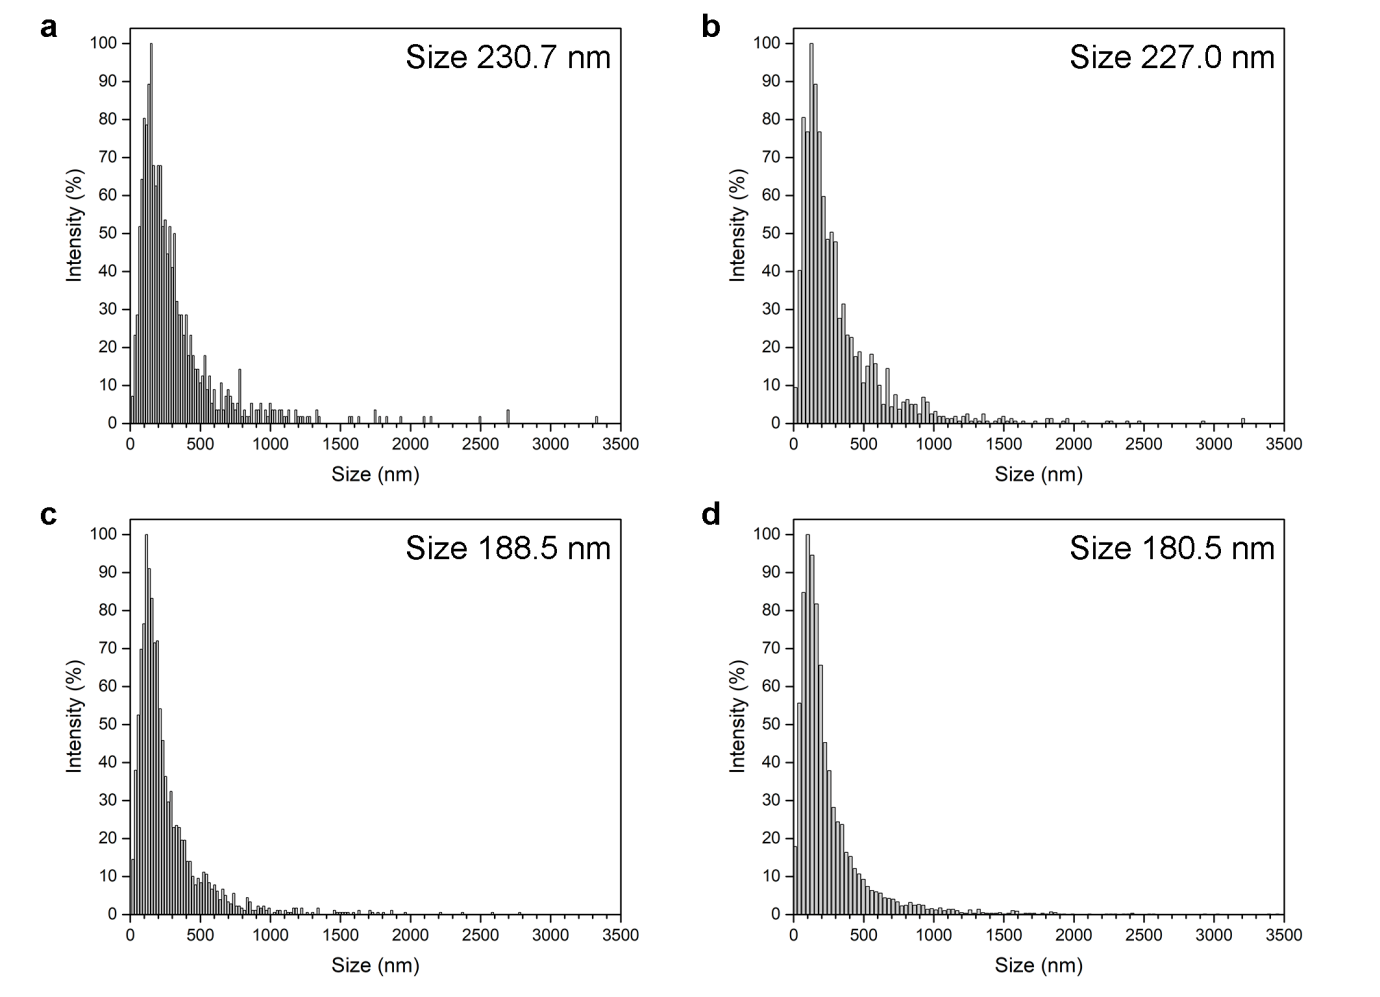


**Figure S1.** Physico-chemical properties of PLGA nanoparticles. Particle size distribution obtained with an AstraTrace (Abisense, Russia) for nanoparticles synthesized with 5 g/L (a), 1.7 g/L (b), 0.5 g/L (c) and 0.17 g/L (d) Nile Blue.
